# Supplementary material for: Optimal Decisions in a Sea-Cargo Supply Chain with Two Competing Freight Forwarders Considering Altruistic Preference and Brand Investment
Source: MDPI journal article supplement (doi:10.3390/systems11080399), 2023-08-02
Supplement: s1 [file s1]

Supplementary File

# Optimal Decisions in a Sea-Cargo Supply Chain with Two Competing Freight Forwarders Considering Altruistic Preference and Brand Investment

## S1. Real Case (Including Key Parts in English)

Corporate Name: Intent Logistics Co., Ltd (Intent International Freight Forwarding Co., Ltd, Shenzhen, China.)

Web Site: <http://www.szycil.com/show-15-18844-1.html> (Accessed on 14 July 2023)

Webpage Snapshot:



欢迎光临深圳市英诚国际货运代理有限公司官方网站!

百度地图

**英诚物流** 专注终端客户服务 18年  
INTENT LOGISTICS CO., LTD. 进出口货物一条龙服务

全国服务热线: 18928486900

网站首页 服务项目 物流百科 物流工具 公司介绍 联系我们

**英诚即诺 一诺定达**  
国际联运 海运 空运 铁运

英诚实力

- 物流学堂
- 客户案例
- 客户问答
- 行业新闻

联系我们

18928486900  
座机: 0755-26646085  
邮箱: service@szycil.com  
地址: 深圳市南山区东滨路4078号永新汇2栋5层

当前位置: 首页 > 物流百科 > 物流学堂 >

天津海运货代公司(天津货代海运公司一览表)

来源: 英诚物流 发布时间: 2023-05-18 23:50:41

**天津海运货代公司**

18928486900

海运空运业务货代公司名称是中远海运航空货运代理有限公司。中远海运航空货运代理有限公司成立于1995年07月11日,注册地位于天津自贸试验区空港国际物流区第二大街一号215室,经营范围包括航空国际货运代理。从事文化经纪业务、陆路、海上国际货运代理、道路货运代理、仓储服务、经济信息咨询、货物进出口等。还包括应用软件服务、销售首饰、工艺品、机械设备、无船承运业务、包装服务、普通货运、国际快递、船舶物资、船舶设备及配件批发零售、提供船舶技术咨询服务、多式联运代理服务中远海运航空货运代理有限公司对外投资6家公司,具有15处分支机构。运营模式:2016年2月18日,由中国远洋运输集团总公司与中国海运集团总公司,重组而成的中国远洋海运集团有限公司,在上海宣告成立,开启了中国和世界海运史的新篇章。5年来,中远海运集团聚焦高质量发展,成为国际航运业东方平衡西方的重要力量。中远海运旗下有11个国家、12个港口。希腊比雷埃夫斯码头、阿布扎比码头、泽布吕赫码头、NOATUM码头、新港码头、比利时安特卫普码头、土耳其KUMPORT码头、苏伊士运河码头、荷兰鹿特丹EYROMAX码头、意大利瓦多码头、韩国釜山码头、以及西雅图码头。

Figure S1. Introduction to China COSCO Shipping Group.

Key Parts in English: The name of the shipping and airfreight forwarding company is China COSCO Shipping Air Freight Agency Co., Ltd, Tianjin, China. It was established on 11 July 1995, with its registered office located at Room 215, No. 1, Second Street, International Logistics Area, Tianjin Free Trade Zone. The company's scope of operations includes international air freight forwarding, cultural brokerage services, international road and sea freight forwarding, road freight agency, warehousing services, economic information consulting, import and export of goods, as well as the provision of application software, jewelry, handicrafts, machinery and equipment sales, non-vessel operating common carrier (NVOCC) services, packaging services, general cargo transportation, international express delivery, ship supplies, wholesale and retail of ship equipment and accessories. Additionally, the company offers ship technology consulting services and multimodal transport agency services.

China COSCO Shipping Air Freight Agency Co., Ltd. has invested in six external companies and has 15 branch offices. China COSCO Shipping Group company was formed on February 18, 2016, through the restructuring of China COSCO Shipping Corporation Limited, which was a merger between China COSCO Shipping Group and China Shipping Group. The establishment of China COSCO Shipping Group marked a new chapter in China's maritime history. Over the past five years, the company has focused on high-quality development and has become an important player in the international shipping industry, balancing the influence of the East and the West.

China COSCO Shipping Group operates in 11 countries and 12 ports, including the ports of Piraeus in Greece, Abu Dhabi, Zeebrugge in Belgium, NOATUM, New Port, Antwerp in Belgium, KUMPORT in Turkey, Suez Canal, EYROMAX in Rotterdam, Vado in Italy, Busan in South Korea, and Seattle in the United States.

## S2. Proofs of Lemmas and Propositions

### S2.1. Proof of Lemma 1

Simultaneously solving Equations (12) and (16) for  $p_1$  and  $p_2$  yields the unique optimal decision pair  $(p_1^*(w_1, e), t_1^*(w_1, e))$  in reaction to the shipping prices. In fact, from Equation (12) we have

$$(-2 + B)p_1 + \mu p_2 = b_1 \quad (S1)$$

and from Equation (16) we have

$$\mu p_1 + (-2 + B)p_2 = b_2 \quad (S2)$$

According to Cramer's Rule, solving Equations (S1) and (S2) for  $p_1$  and  $p_2$  simultaneously yields the optimal decisions  $p_1^*$  in Equation (19) and  $p_2^*$  in Equation (21). Note that  $p_1^*$  and  $p_2^*$  are unique because the determinant of the coefficient matrix of the equation system composed of Equations (S1) and (S2) is nonzero based on Equation

$$(5), \text{ i.e., } \begin{vmatrix} -2+B & \mu \\ \mu & -2+B \end{vmatrix} = (-2+B)^2 - \mu^2 \neq 0.$$

Substituting Equations (19) and (21) into Equations (13) and (17), respectively, we can derive  $t_1^*$  in Equation (20) and  $t_2^*$  in Equation (22). In fact, note that

$$\begin{aligned}
p_1^*(w_1, e) - w_1 &= \frac{(-2+B)b_1 - \mu b_2}{(-2+B)^2 - \mu^2} - w_1 = \frac{(-2+B)b_1 - \mu b_2 - (-2+B)^2 w_1 + \mu^2 w_1}{(-2+B)^2 - \mu^2} \\
&= \frac{(-2+B)[-k - \lambda e + (B-1)w_1 - (-2+B)w_1] - \mu b_2 + \mu^2 w_1}{(-2+B)^2 - \mu^2} \\
&= \frac{(-2+B)[-k - \lambda e + w_1] - \mu b_2 + \mu^2 w_1}{(-2+B)^2 - \mu^2}
\end{aligned} \tag{S3}$$

Thus, from Equations (13) and (S3), Formula (20) holds, and similarly we can obtain Formula (22). It is clear that  $t_1^*(w_1, e)$  and  $t_2^*(w_2, e)$  are also unique according to the uniqueness of  $p_1^*(w_1, e)$  and  $p_2^*(w_2, e)$ . So, Lemma 1 is proved.  $\square$

### S2.2. Proof of Lemma 2

From Equation (23), it can be deduced that

$$\begin{aligned}
d &= (2-B+\mu)k + c[-2+B+\mu^2 + \mu(1-B)] = (2-B+\mu)k + c[-2+B+\mu^2 + \mu - \mu B] \\
&= (2-B+\mu)k - c[2-B-\mu^2 - \mu + \mu B] = (2-B+\mu)k - c[2-B+\mu - 2\mu - \mu^2 + \mu B] \\
&= (2-B+\mu)k - c[2-B+\mu - \mu(2-B+\mu)] \\
&= (2-B+\mu)k - c(2-B+\mu)(1-\mu) = (2-B+\mu)[k - c(1-\mu)]
\end{aligned} \tag{S4}$$

According to Inequality (4) and Assumption 3,  $d > 0$ .  $\square$

### S2.3. Proof of Lemma 3

From Equation (24), it follows that

$$\begin{aligned}
C + D &= -2+B+\mu^2 + \mu(1-B) = -2+B-\mu+2\mu+\mu^2 - \mu B \\
&= -(2-B+\mu) + \mu(2-B+\mu) = -(2-B+\mu)(1-\mu) < 0
\end{aligned} \tag{S5}$$

$$\begin{aligned}
C - D &= -2+B+\mu^2 - \mu(1-B) = -2+B+\mu-2\mu+\mu B + \mu^2 \\
&= -(2-B-\mu) - \mu(2-B-\mu) = -(2-B-\mu)(1+\mu) < 0
\end{aligned} \tag{S6}$$

The proof is completed.  $\square$

### S2.4. Proof of Proposition 1

First, substituting Equations (14) and (18) into (19) yields

$$\begin{aligned}
p_1^*(w_1, e) &= \frac{(-2+B)[-k - \lambda e - (1-B)w_1] - \mu[-k - \lambda e - (1-B)w_2]}{(-2+B)^2 - \mu^2} \\
&= \frac{(2-B+\mu)(k + \lambda e) + (2-B)(1-B)w_1 + \mu(1-B)w_2}{(-2+B)^2 - \mu^2} \\
&= \frac{(2-B+\mu)(k + \lambda e) + (2-B)(1-B)(w_1 - c) + \mu(1-B)(w_2 - c) + c(1-B)[2-B+\mu]}{(-2+B)^2 - \mu^2}
\end{aligned} \tag{S7}$$

Similarly, we have

$$p_2^*(w_2, e) = \frac{(2-B+\mu)(k + \lambda e) + \mu(1-B)(w_1 - c) + (2-B)(1-B)(w_2 - c) + c(1-B)[2-B+\mu]}{(-2+B)^2 - \mu^2} \tag{S8}$$

Second, substituting Equation (18) into (20), we derive the following expression for  $t_1^*(w_1, e)$ .

$$t_1^*(w_1, e) = B_0 \cdot \frac{(-2+B)[-k-\lambda e+w_1]-\mu[-k-\lambda e-(1-B)w_2]+\mu^2 w_1}{(-2+B)^2-\mu^2} \quad (S9)$$

According to Equation (23), we obtain

$$\begin{aligned} & (-2+B)[-k-\lambda e+w_1]-\mu[-k-\lambda e-(1-B)w_2]+\mu^2 w_1 \\ &= (2-B+\mu)(k+\lambda e)+(-2+B)w_1+\mu(1-B)w_2+\mu^2 w_1 \\ &= (2-B+\mu)\lambda e+[-2+B+\mu^2](w_1-c)+\mu(1-B)(w_2-c) \\ & \quad + (2-B+\mu)k+c[-2+B+\mu^2+\mu(1-B)] \\ &= (2-B+\mu)\lambda e+(-2+B+\mu^2)(w_1-c)+\mu(1-B)(w_2-c)+d \end{aligned} \quad (S10)$$

Thus,

$$t_1^*(w_1, e) = B_0 \cdot \frac{(2-B+\mu)\lambda e+(-2+B+\mu^2)(w_1-c)+\mu(1-B)(w_2-c)+d}{(-2+B)^2-\mu^2} \quad (S11)$$

Similarly, we can obtain

$$t_2^*(w_2, e) = B_0 \cdot \frac{(2-B+\mu)\lambda e+\mu(1-B)(w_1-c)+(-2+B+\mu^2)(w_2-c)+d}{(-2+B)^2-\mu^2} \quad (S12)$$

Third, substituting Equations (S7), (S8) and (S11) into the demand function (1), we get

$$\begin{aligned} Q_1 &= Q_1(p_1, p_2, e, t_1) = k - p_1 + \mu p_2 + \lambda e + \eta t_1 \\ &= k + \lambda e - \frac{(2-B+\mu)(k+\lambda e)+(2-B)(1-B)(w_1-c)+\mu(1-B)(w_2-c)+c(1-B)(2-B+\mu)}{(-2+B)^2-\mu^2} \\ & \quad + \mu \frac{(2-B+\mu)(k+\lambda e)+\mu(1-B)(w_1-c)+(2-B)(1-B)(w_2-c)+c(1-B)(2-B+\mu)}{(-2+B)^2-\mu^2} \\ & \quad + \eta B_0 \cdot \frac{(2-B+\mu)\lambda e+(-2+B+\mu^2)(w_1-c)+\mu(1-B)(w_2-c)+d}{(-2+B)^2-\mu^2} \\ &= \frac{\Delta_1(w_1-c)}{(-2+B)^2-\mu^2} + \frac{\Delta_2(w_2-c)}{(-2+B)^2-\mu^2} + \frac{\Delta_3 \lambda e}{(-2+B)^2-\mu^2} + \frac{\Delta_4}{(-2+B)^2-\mu^2} \end{aligned} \quad (S13)$$

where

$$\begin{aligned}
 \Delta_1 &= -(2-B)(1-B) + \mu^2(1-B) + B(-2+B+\mu^2) = -2+B+\mu^2 \\
 \Delta_2 &= -\mu(1-B) + \mu(2-B)(1-B) + B\mu(1-B) = \mu(1-B) \\
 \Delta_3 &= (2-B+\mu)(-1+\mu+B)\lambda e + [(-2+B)^2 - \mu^2] \\
 &= (2-B+\mu)(-1+\mu+B+2-B-\mu) \\
 &= 2-B+\mu, \\
 \Delta_4 &= (2-B+\mu)(-1+\mu)k - c(1-B)(2-B+\mu) + \mu c(1-B)(2-B+\mu) \\
 &\quad + Bd + [(-2+B)^2 - \mu^2]k \\
 &= (2-B+\mu)\{k - c + cB + \mu c - \mu cB - Bk + B[k - c(1-\mu)]\} \\
 &= (2-B+\mu)[k - c(1-\mu)] \\
 &= d
 \end{aligned} \tag{S14}$$

Thus, the demand function (1) can be expressed as

$$\begin{aligned}
 Q_1 &= \frac{-2+B+\mu^2}{(-2+B)^2 - \mu^2}(w_1 - c) + \frac{\mu(1-B)}{(-2+B)^2 - \mu^2}(w_2 - c) \\
 &\quad + \frac{\lambda(2-B+\mu)}{(-2+B)^2 - \mu^2}e + \frac{d}{(-2+B)^2 - \mu^2}
 \end{aligned} \tag{S15}$$

Similar to the above derivation, demand function (2) can be represented as

$$\begin{aligned}
 Q_2 &= \frac{\mu(1-B)}{(-2+B)^2 - \mu^2}(w_1 - c) + \frac{-2+B+\mu^2}{(-2+B)^2 - \mu^2}(w_2 - c) \\
 &\quad + \frac{\lambda(2-B+\mu)}{(-2+B)^2 - \mu^2}e + \frac{d}{(-2+B)^2 - \mu^2}
 \end{aligned} \tag{S16}$$

By taking partial derivatives of Equation (6) with respect to  $w_1, w_2$ , and  $e$ , respectively, one can derive that

$$\begin{aligned}
 \frac{\partial \pi_s}{\partial w_1} &= Q_1 + (w_1 - c) \frac{\partial Q_1}{\partial w_1} + (w_2 - c) \frac{\partial Q_2}{\partial w_1} \\
 \frac{\partial \pi_s}{\partial w_2} &= (w_1 - c) \frac{\partial Q_1}{\partial w_2} + Q_1 + (w_2 - c) \frac{\partial Q_2}{\partial w_2} \\
 \frac{\partial \pi_s}{\partial e} &= (w_1 - c) \frac{\partial Q_1}{\partial e} + (w_2 - c) \frac{\partial Q_2}{\partial e} - 2\alpha e
 \end{aligned} \tag{S17}$$

By taking partial derivatives of Equations (S15) and (S16) with respect to  $w_1, w_2$ , and  $e$ , respectively, and substituting Equation (S17), we obtain that

$$\begin{aligned}
 \frac{\partial \pi_s}{\partial w_1} &= \frac{2C(w_1 - c) + 2D(w_2 - c) + \lambda(2-B+\mu)e + d}{(-2+B)^2 - \mu^2} \\
 \frac{\partial \pi_s}{\partial w_2} &= \frac{2D(w_1 - c) + 2C(w_2 - c) + \lambda(2-B+\mu)e + d}{(-2+B)^2 - \mu^2} \\
 \frac{\partial \pi_s}{\partial e} &= \frac{\lambda(2-B+\mu)}{(-2+B)^2 - \mu^2}(w_1 - c) + \frac{\lambda(2-B+\mu)}{(-2+B)^2 - \mu^2}(w_2 - c) - 2\alpha e
 \end{aligned} \tag{S18}$$

where  $C$  and  $D$  are defined in Equation (24).

By setting the first-order partial derivatives to zero, we can obtain the following system of linear equations:

$$\begin{aligned} 2C(w_1 - c) + 2D(w_2 - c) + \lambda(2 - B + \mu)e + d &= 0 \\ 2D(w_1 - c) + 2C(w_2 - c) + \lambda(2 - B + \mu)e + d &= 0 \\ \lambda(w_1 - c) + \lambda(w_2 - c) - 2\alpha(2 - B - \mu)e &= 0 \end{aligned} \quad (S19)$$

For simplicity, we denote

$$\Delta = (-2 + B)^2 - \mu^2 \quad (S20)$$

Hence, the Hessian matrix is

$$H_1 = \begin{bmatrix} 2C & 2D & \lambda(2 - B + \mu) \\ 2D & 2C & \lambda(2 - B + \mu) \\ \lambda & \lambda & -2\alpha(2 - B - \mu) \end{bmatrix} \quad (S21)$$

The first leading principal minor of  $H_1$  is  $D_1 = 2C = 2[-2 + B + \mu^2]$ . From Assumption 2, we have  $D_1 < 2[-2 + 2 - \mu + \mu^2] = 2[-\mu(1 - \mu)] < 0$ .

The second leading principal minor of  $H_1$  is

$$D_2 = 4(C^2 - D^2) = 4(C - D)(C + D) \quad (S22)$$

Based on Lemma 3, it is clear that  $D_2 > 0$ .

The third leading principal minor of  $H_1$  is

$$D_3 = -4(C - D)[2\alpha(C + D)(2 - B - \mu) + \lambda^2(2 - B + \mu)] \quad (S23)$$

According to  $C - D < 0$  and the condition of the proposition, we have  $D_3 < 0$ .

Therefore, the matrix  $H_1$  is negative definite, meaning that  $\pi_s$  is a strictly concave function of  $w_1$ ,  $w_2$ , and  $e$ , and it has a unique solution to maximize  $\pi_s$ .

Finally, solving the system of linear equations (S18) for  $w_1$ ,  $w_2$ , and  $e$  yields the optimal pricing decisions  $w_1^*$  and  $w_2^*$  in Equation (29) and brand value  $e^*$  in Equation (30).

From Inequality (4) and Condition (28) in this proposition, we have  $\lambda^2(2 - B + \mu) + 2\alpha(C + D)(2 - B - \mu) < 0$ . Based on this, Assumption 2 and Formula (25), it is clear that  $w_1^*$ ,  $w_2^*$ , and  $e^*$  are positive and  $w_1^* = w_2^* > c$ .

Furthermore, substituting  $w_1^*$ ,  $w_2^*$ , and  $e^*$  into Equation (S7) and noting that  $w_1^* = w_2^*$ , we can obtain the following

$$p_1^* = \frac{(2 - B + \mu)(k + \lambda e^*) + (1 - B)[(2 - B + \mu)(w_1^* - c) + c(1 - B)[2 - B + \mu]]}{(-2 + B)^2 - \mu^2} \quad (S24)$$

$$\begin{aligned}
 &= \frac{(k + \lambda e^*) + (1 - B)w_1^* + c(1 - B)}{2 - B - \mu} \\
 &= \frac{k + (1 - B)c}{(2 - B - \mu)} + \frac{-d\lambda^2 - d\alpha(1 - B)(2 - B - \mu)}{(2 - B - \mu)[\lambda^2(2 - B + \mu) + 2\alpha(C + D)(2 - B - \mu)]} \\
 &= \frac{k + (1 - B)c}{(2 - B - \mu)} - c + \frac{-d\lambda^2 - d\alpha(1 - B)(2 - B - \mu)}{(2 - B - \mu)[\lambda^2(2 - B + \mu) + 2\alpha(C + D)(2 - B - \mu)]} + c \\
 &= \frac{k - (1 - \mu)c}{(2 - B - \mu)} + \frac{-d\lambda^2 - d\alpha(1 - B)(2 - B - \mu)}{(2 - B - \mu)[\lambda^2(2 - B + \mu) + 2\alpha(C + D)(2 - B - \mu)]} + c.
 \end{aligned}$$

From Formula (25), we have

$$\begin{aligned}
 p_1^* &= \frac{[k - (1 - \mu)c] \cdot 2\alpha(C + D)(2 - B - \mu) - d\alpha(1 - B)(2 - B - \mu)}{(2 - B - \mu)[\lambda^2(2 - B + \mu) + 2\alpha(C + D)(2 - B - \mu)]} - (w_1^* - c) + w_1^* \\
 &= \frac{[k - (1 - \mu)c] \cdot 2\alpha(C + D) - d\alpha[(1 - B) - (2 - B - \mu)]}{\lambda^2(2 - B + \mu) + 2\alpha(C + D)(2 - B - \mu)} + w_1^* \\
 &= \frac{[k - (1 - \mu)c] \cdot 2\alpha(C + D) + d\alpha(1 - \mu)}{\lambda^2(2 - B + \mu) + 2\alpha(C + D)(2 - B - \mu)} + w_1^* \\
 &= \frac{\alpha[k - (1 - \mu)c] \cdot [2(C + D) + (2 - B + \mu)(1 - \mu)]}{\lambda^2(2 - B + \mu) + 2\alpha(C + D)(2 - B - \mu)} + w_1^*.
 \end{aligned} \tag{S25}$$

Thus, from Lemma 3, we have

$$\begin{aligned}
 p_1^* &= \frac{\alpha[k - (1 - \mu)c] \cdot [2(C + D) - (C + D)]}{\lambda^2(2 - B + \mu) + 2\alpha(C + D)(2 - B - \mu)} + w_1^* \\
 &= \frac{\alpha[k - (1 - \mu)c] \cdot (C + D)}{\lambda^2(2 - B + \mu) + 2\alpha(C + D)(2 - B - \mu)} + w_1^* \\
 &= \frac{\alpha[k - (1 - \mu)c] \cdot (C + D)}{\lambda^2(2 - B + \mu) + 2\alpha(C + D)(2 - B - \mu)} + c + \frac{-d\alpha(2 - B - \mu)}{\lambda^2(2 - B + \mu) + 2\alpha(C + D)(2 - B - \mu)} \\
 &= \frac{\alpha[k - c(1 - \mu)] \cdot (C + D) - d\alpha(2 - B - \mu)}{\lambda^2(2 - B + \mu) + 2\alpha(C + D)(2 - B - \mu)} + c
 \end{aligned} \tag{S26}$$

This leads to  $p_1^*$  in Equation (31). According to Assumption 3, Formula (26), and under the condition that  $\lambda^2(2 - B + \mu) + 2\alpha(C + D)(2 - B - \mu) < 0$  (i.e., Condition (28)), it is clear that  $p_1^* > w_1^*$ .

Substituting  $w_1^*$ ,  $w_2^*$ , and  $e^*$  into Equation (S8) and following a similar proof as above, we can obtain  $p_2^* = p_1^* > w_1^* = w_2^*$ .

Replacing  $w_1$ ,  $w_2$ , and  $e$  with  $w_1^*$ ,  $w_2^*$ , and  $e^*$  in (S11), respectively, and noting that  $w_1^* = w_2^*$ , we can obtain

$$\begin{aligned}
 t_1^* &= B_0 \cdot \frac{(2-B+\mu)\lambda e^* + (-2+B+\mu^2)(w_1^* - c) + \mu(1-B)(w_2^* - c) + d}{(-2+B)^2 - \mu^2} \\
 &= B_0 \cdot \frac{(2-B+\mu)\lambda e^* + [-2+B+\mu^2 + \mu(1-B)](w_1^* - c) + d}{(-2+B)^2 - \mu^2} \\
 &= B_0 \cdot \frac{d + \lambda(2-B+\mu)e^* - [2-B-\mu + B\mu - \mu^2](w_1^* - c)}{(-2+B)^2 - \mu^2}
 \end{aligned} \tag{S27}$$

Using Formula (S5) and substituting  $w_1^*$  and  $e^*$  into Equation (S27), it follows that

$$\begin{aligned}
 t_1^* &= B_0 \cdot \frac{d + (2-B+\mu)\lambda e^* + (C+D)(w_1^* - c)}{(-2+B)^2 - \mu^2} \\
 &= B_0 \cdot \frac{(2-B+\mu)[k-c(1-\mu)]}{(-2+B)^2 - \mu^2} \cdot \frac{\alpha(C+D)(2-B-\mu)}{\lambda^2(2-B+\mu) + 2\alpha(C+D)(2-B-\mu)} \\
 &= \frac{B_0 \cdot \alpha(C+D)[k-c(1-\mu)]}{\lambda^2(2-B+\mu) + 2\alpha(C+D)(2-B-\mu)}
 \end{aligned} \tag{S28}$$

Thus, we obtain  $t_1^*$  in Equation (32). According to Assumption 3, Formula (26), and the condition that  $\lambda^2(2-B+\mu) + 2\alpha(C+D)(2-B-\mu) < 0$  (i.e., Condition (28)), it is clear that  $t_1^* > 0$ .

Similarly, substituting  $w_1^*$ ,  $w_2^*$ , and  $e^*$  into Equation (S12), it follows that  $t_2^* = t_1^* > 0$ .

Substituting  $w_1^*$ ,  $w_2^*$ , and  $e^*$  into Equation (S15), one can derive that

$$\begin{aligned}
 Q_1^* &= \frac{-2+B+\mu^2}{(-2+B)^2 - \mu^2} (w_1^* - c) + \frac{\mu(1-B)}{(-2+B)^2 - \mu^2} (w_2^* - c) \\
 &\quad + \frac{\lambda(2-B+\mu)}{(-2+B)^2 - \mu^2} e^* + \frac{d}{(-2+B)^2 - \mu^2} \\
 &= \frac{-2+B+\mu^2 + \mu(1-B)}{(-2+B)^2 - \mu^2} (w_1^* - c) + \frac{\lambda(2-B+\mu)}{(-2+B)^2 - \mu^2} e^* + \frac{d}{(-2+B)^2 - \mu^2} \\
 &= \frac{-d[\alpha(2-B-\mu)(C+D) + \lambda^2(2-B+\mu)]}{[(-2+B)^2 - \mu^2][\lambda^2(2-B+\mu) + 2\alpha(C+D)(2-B-\mu)]} + \frac{d}{(-2+B)^2 - \mu^2} \\
 &= \frac{-d}{(-2+B)^2 - \mu^2} \left[ \frac{\alpha(2-B-\mu)(C+D) + \lambda^2(2-B+\mu)}{\lambda^2(2-B+\mu) + 2\alpha(C+D)(2-B-\mu)} - 1 \right] \\
 &= \frac{\alpha(C+D)d}{(2-B+\mu)[\lambda^2(2-B+\mu) + 2\alpha(C+D)(2-B-\mu)]} \\
 &= \frac{\alpha(C+D)(2-B+\mu)[k-c(1-\mu)]}{(2-B+\mu)[\lambda^2(2-B+\mu) + 2\alpha(C+D)(2-B-\mu)]} \\
 &= \frac{\alpha(C+D)[k-c(1-\mu)]}{\lambda^2(2-B+\mu) + 2\alpha(C+D)(2-B-\mu)}
 \end{aligned} \tag{S29}$$



Therefore, we get  $Q_1^*$  in Equation (33). According to Assumption 3, Formula (26), and the condition that  $\lambda^2(2-B+\mu)+2\alpha(C+D)(2-B-\mu)<0$  (i.e., Condition (28)), it is clear that  $Q_1^*>0$ .

Substituting  $w_1^*$ ,  $w_2^*$ , and  $e^*$  into Equation (S16), similar to the proof of  $Q_1^*$ , we obtain  $Q_2^*=Q_1^*>0$ .

Substituting  $w_1^*$ ,  $w_2^*$ ,  $e^*$ ,  $Q_1^*$ , and  $Q_2^*$  into Equation (6) yields the maximal profit shown as follows:

$$\begin{aligned}\pi_s^* &= (w_1^*-c)Q_1^* + (w_2^*-c)Q_2^* - \alpha e^{*2} = (Q_1^*+Q_2^*)(w_1^*-c) - \alpha e^{*2} \\ &= \frac{\alpha d[k-c(1-\mu)][-2\alpha(C+D)(2-B-\mu)-\lambda^2(2-B+\mu)]}{[\lambda^2(2-B+\mu)+2\alpha(C+D)(2-B-\mu)]^2} \\ &= \frac{-\alpha d[k-c(1-\mu)]}{\lambda^2(2-B+\mu)+2\alpha(C+D)(2-B-\mu)}\end{aligned}\quad (S30)$$

Noting that  $p_1-w_1=\frac{t_1}{B_0}$  from Equation (13), one can derive that

$$\begin{aligned}p_1^*-w_1^* &= \frac{\alpha[k-c(1-\mu)]\cdot(C+D)-d\alpha(2-B-\mu)}{\lambda^2(2-B+\mu)+2\alpha(C+D)(2-B-\mu)} + c-w_1 \\ &= \frac{\alpha[k-c(1-\mu)]\cdot(C+D)}{\lambda^2(2-B+\mu)+2\alpha(C+D)(2-B-\mu)}\end{aligned}\quad (S31)$$

Substituting Equation (S31),  $Q_1^*$ , and  $t_1^*$  into Equation (7) yields the maximal profits of the two forwarders:

$$\begin{aligned}\pi_{f_1}^* &= \pi_{f_2}^* = (p_1^*-w_1^*)Q_1^* - \beta t_1^{*2} \\ &= \frac{(1-\beta B_0^2)[\alpha(C+D)[k-c(1-\mu)]^2}{[\lambda^2(2-B+\mu)+2\alpha(C+D)(2-B-\mu)]^2} \\ &= \frac{(1-\beta B_0^2)[\alpha(2-B+\mu)(1-\mu)]^2[k-c(1-\mu)]^2}{[\lambda^2(2-B+\mu)-2\alpha(2-B+\mu)(1-\mu)(2-B-\mu)]^2} \\ &= \frac{(1-\beta B_0^2)[\alpha(1-\mu)]^2[k-c(1-\mu)]^2}{[\lambda^2-2\alpha(1-\mu)(2-B-\mu)]^2}\end{aligned}\quad (S32)$$

From Assumption 1, we have  $1-\beta B_0^2=1-\beta\left(\frac{\eta}{2\beta}\right)^2=1-\frac{\eta^2}{4\beta}>0$ . Thus,

$$\pi_{f_1}^*=\pi_{f_2}^*>0. \square$$

#### S2.5. Proof of Lemma 4

Similar to the proof of Lemma 1, solving Equations (41) and (46) for  $p_1$  and  $p_2$  simultaneously yields the unique optimal decision pair  $(p_1^{**}, p_2^{**})$  in reaction to the shipping prices.

Substituting Equations (49) and (51) into Equations (42) and (47), respectively, we can obtain  $t_1^{**}(w_1, e)$  in Equation (50) and  $t_2^{**}(w_2, e)$  in Equation (52). In fact, note that

$$\begin{aligned}
 p_1^{**}(w_1, e) - \bar{w}_1 &= \frac{(-2+B)b_3 - \mu b_4}{(-2+B)^2 - \mu^2} - \bar{w}_1 \\
 &= \frac{(-2+B)[-k - \lambda e + (B-1)\bar{w}_1 - \varepsilon\mu(w_2 - c) - (-2+B)\bar{w}_1] - \mu b_4 + \mu^2 \bar{w}_1}{(-2+B)^2 - \mu^2} \\
 &= \frac{(-2+B)[-k - \lambda e + \bar{w}_1 - \varepsilon\mu(w_2 - c)] - \mu b_4 + \mu^2 \bar{w}_1}{(-2+B)^2 - \mu^2}
 \end{aligned} \tag{S33}$$

From Equations (42) and (S33), Formula (50) holds. Following a similar proof as above, we can obtain Equation (52). It is clear that  $t_1^{**}(w_1, e)$  and  $t_2^{**}(w_2, e)$  are also unique, given the uniqueness of  $p_1^{**}(w_1, e)$  and  $p_2^{**}(w_2, e)$ .  $\square$

### S2.6. Proof of Lemma 5

Directly from Equation (53), we have

$$\begin{aligned}
 M + N &= [2 - B + \mu(B-1)(3-B) + \mu^3]\varepsilon - [2 - B - \mu^2 + \mu(B-1)] \\
 &= s_1\varepsilon + s_2
 \end{aligned} \tag{S34}$$

where

$$\begin{aligned}
 s_1 &= 2 - B + \mu(B-1)(3-B) + \mu^3 \\
 &= 2 - B + \mu - \mu(B^2 - 4B + 4) + \mu^3 \\
 &= (2 - B + \mu)[1 - \mu(2 - B - \mu)] \\
 &= (2 - B + \mu)[(1 - \mu)^2 + \mu B] \\
 &> 0
 \end{aligned} \tag{S35}$$

and

$$s_2 = -[2 - B - \mu^2 + \mu(B-1)] = C + D = -(2 - B + \mu)(1 - \mu) < 0 \tag{S36}$$

based on Lemma 3. Thus, when  $\varepsilon < \frac{-s_2}{s_1}$ ,  $M + N < 0$ .

From Equation (53), we also have

$$\begin{aligned}
 M - N &= (-2+B)(1-\varepsilon) + \mu^2 - [\mu(B-1)(3\varepsilon - \varepsilon B - 1) + \mu^3\varepsilon] \\
 &= [(2-B) - \mu(B-1)(3-B) - \mu^3]\varepsilon + (-2+B) + \mu^2 + \mu(B-1) \\
 &= s_3\varepsilon + s_4
 \end{aligned} \tag{S37}$$

where

$$\begin{aligned}
 s_3 &= (2-B) - \mu(B-1)(3-B) - \mu^3 \\
 &= \mu B^2 - (1+4\mu)B + 2 + 3\mu - \mu^3 \\
 &= \mu B^2 - (1+\mu)^2 B - (2-\mu)\mu B + (2-\mu)(1+\mu)^2 \\
 &= \mu B(B-2+\mu) - (1+\mu)^2(B-2+\mu) \\
 &= (B-2+\mu)[\mu B - (1+\mu)^2] = (2-B-\mu)[(1+\mu)^2 - \mu B]
 \end{aligned} \tag{S38}$$

and

$$\begin{aligned}
 s_4 &= (-2 + B) + \mu^2 + \mu(B - 1) \\
 &= -[2 - B - \mu + \mu(2 - \mu - B)] \\
 &= -(2 - B - \mu)(1 + \mu)
 \end{aligned}
 \tag{S39}$$

Because  $-B > -2 + \mu$  under Assumption 2, we have

$$\begin{aligned}
 (1 + \mu)^2 - \mu B &> (1 + \mu)^2 + \mu(-2 + \mu) = (1 + 2\mu + \mu^2) - 2\mu + \mu^2 \\
 &= 2\mu^2 + 1 > 0
 \end{aligned}
 \tag{S40}$$

Thus,  $s_3 > 0$ . From Assumption 2, it is easy to get  $s_4 < 0$ .

Finally, we conclude that  $M - N < 0$  when  $\varepsilon < \frac{-s_4}{s_3}$ .  $\square$

### S2.7. Proof of Lemma 6

First, note that we can rewrite Equation (56) as

$$\begin{aligned}
 s_5 &= (2 - B + \mu)[2(1 - \mu)^2 + 2\mu B - 1 + (2 - B - \mu)] \\
 &= (2 - B + \mu)[3 - 5\mu + 2\mu^2 + 2\mu B - B] \\
 &= (2 - B + \mu)[2\mu^2 - (5 - 2B)\mu + 3 - B]
 \end{aligned}
 \tag{S41}$$

We claim that the term  $2\mu^2 - (5 - 2B)\mu + 3 - B$  in Equation (S41) is positive, and this can be proven as follows. If  $2\mu^2 - (5 - 2B)\mu + 3 - B \leq 0$ , then  $(5 - 2B)^2 - 8(3 - B) = 1 - 12B + 4B^2 \geq 0$  and  $\mu_1 < \mu < \mu_2$ , where  $\mu_{1,2} = \frac{(5 - 2B) \pm \sqrt{1 - 12B + 4B^2}}{4}$ . Combined with Assumption 2, we have  $B < \frac{3 - \sqrt{8}}{2}$ . It is clear that  $1 - 12B + 4B^2 < 1 - 4B + 4B^2 = (1 - 2B)^2$ . Thus,  $\sqrt{1 - 12B + 4B^2} < 1 - 2B$ , and therefore  $(5 - 2B) - \sqrt{1 - 12B + 4B^2} > 4$ , which leads to  $\mu_1 > 1$ . This contradicts with  $\mu < 1$ . When combined with Formulas (4) and (S11), this results in  $s_5 > 0$ .  $\square$

### S2.8. Proof of Proposition 2

We first need to show that  $\varepsilon$  is well-defined. It is clear that  $\mu^2 < \mu$  because  $0 < \mu < 1$ . Thus,  $2 - B - \mu^2 > 2 - B - \mu > 0$  based on Assumption 2. Combining with Lemmas 5 and 6, it can be concluded that  $\varepsilon$  is well-defined.

(a) We express  $p_i$ ,  $t_i$ , and  $Q_i$  as a linear combination of  $w_i - c_i$  ( $i = 1, 2$ ) and  $e$ .

Substituting Equations (43) and (48) into Equation (49), we get

$$\begin{aligned}
 p_1^{**}(w_1, e) &= \frac{(-2+B)b_3 - \mu b_4}{(-2+B)^2 - \mu^2} \\
 &= \frac{(-2+B)[-k - \lambda e - (1-B)\bar{w}_1 - \varepsilon\mu(w_2 - c)] - \mu[-k - \lambda e - (1-B)\bar{w}_2 - \varepsilon\mu(w_1 - c)]}{(-2+B)^2 - \mu^2} \\
 &= \frac{(-2+B-\mu)(-k - \lambda e) - (-2+B)(1-B)\bar{w}_1 + \varepsilon\mu^2(w_1 - c) - (-2+B)\varepsilon\mu(w_2 - c) + \mu(1-B)\bar{w}_2}{(-2+B)^2 - \mu^2}
 \end{aligned} \tag{S42}$$

Based on Equations (40) and (45), the last four terms in the numerator in Equation (S42) can be rewritten as

$$\begin{aligned}
 &-(-2+B)(1-B)\bar{w}_1 + \varepsilon\mu^2(w_1 - c) - (-2+B)\varepsilon\mu(w_2 - c) + \mu(1-B)\bar{w}_2 \\
 &= [(2-B)(1-B)(1-\varepsilon) + \varepsilon\mu^2](w_1 - c) + [(2-B)\varepsilon\mu + \mu(1-B)(1-\varepsilon)](w_2 - c) \\
 &\quad + c(1-B)(2-B+\mu)
 \end{aligned} \tag{S43}$$

Thus, we obtain the following expression for  $p_1^{**}(w_1, e)$ :

$$\begin{aligned}
 p_1^{**}(w_1, e) &= \frac{[(2-B)(1-B)(1-\varepsilon) + \varepsilon\mu^2](w_1 - c) + [(2-B)\varepsilon\mu + \mu(1-B)(1-\varepsilon)](w_2 - c)}{(-2+B)^2 - \mu^2} \\
 &\quad + \frac{(2-B+\mu)(k + \lambda e) + c(1-B)[2-B+\mu]}{(-2+B)^2 - \mu^2}
 \end{aligned} \tag{S44}$$

Since  $(2-B)\varepsilon\mu + \mu(1-B)(1-\varepsilon) = \mu(1-B) + \varepsilon\mu$ , and considering Equation (S44), we get

$$\begin{aligned}
 p_1^{**}(w_1, e) &= \frac{[(2-B)(1-B)(1-\varepsilon) + \varepsilon\mu^2](w_1 - c) + [\mu(1-B) + \varepsilon\mu](w_2 - c)}{(-2+B)^2 - \mu^2} \\
 &\quad + \frac{(2-B+\mu)(k + \lambda e) + c(1-B)[2-B+\mu]}{(-2+B)^2 - \mu^2}
 \end{aligned} \tag{S45}$$

Similarly, we have

$$\begin{aligned}
 p_2^{**}(w_2, e) &= \frac{[\mu(1-B) + \varepsilon\mu](w_1 - c) + [(2-B)(1-B)(1-\varepsilon) + \varepsilon\mu^2](w_2 - c)}{(-2+B)^2 - \mu^2} \\
 &\quad + \frac{(2-B+\mu)(k + \lambda e) + c(1-B)[2-B+\mu]}{(-2+B)^2 - \mu^2}
 \end{aligned} \tag{S46}$$

Substituting Equation (48) into Equation (50) yields the following expression for  $t_1^{**}(w_1, e)$ :

$$\begin{aligned}
t_1^{**}(w_1, e) &= B_0 \cdot \frac{(-2+B)[-k-\lambda e+\bar{w}_1-\varepsilon\mu(w_2-c)]-\mu b_4+\mu^2\bar{w}_1}{(-2+B)^2-\mu^2} \\
&= B_0 \cdot \frac{(-2+B)[-k-\lambda e+\bar{w}_1-\varepsilon\mu(w_2-c)]-\mu[-k-\lambda e-(1-B)\bar{w}_2-\varepsilon\mu(w_1-c)]+\mu^2\bar{w}_1}{(-2+B)^2-\mu^2} \\
&= B_0 \cdot \frac{(2-B+\mu)(k+\lambda e)+(-2+B)\bar{w}_1+(2-B)\varepsilon\mu(w_2-c)+\mu(1-B)\bar{w}_2+\varepsilon\mu^2(w_1-c)+\mu^2\bar{w}_1}{(-2+B)^2-\mu^2}
\end{aligned} \tag{S47}$$

where the last four terms in the numerator of  $t_1^{**}(w_1, e)$  can be rewritten as

$$\begin{aligned}
&(-2+B)\bar{w}_1+(2-B)\varepsilon\mu(w_2-c)+\mu(1-B)\bar{w}_2+\varepsilon\mu^2(w_1-c)+\mu^2\bar{w}_1 \\
&=[(-2+B)+\mu^2]\bar{w}_1+\varepsilon\mu^2(w_1-c)+(2-B)\varepsilon\mu(w_2-c)+\mu(1-B)\bar{w}_2 \\
&=[(-2+B)(1-\varepsilon)+\mu^2](w_1-c)+[\mu(1-B)+\varepsilon\mu](w_2-c) \\
&\quad +c[-2+B+\mu^2+\mu(1-B)]
\end{aligned} \tag{S48}$$

From Equation (S48) and by combining with Equation (23), we get

$$t_1^{**}(w_1, e) = B_0 \cdot \frac{d+\lambda(2-B+\mu)e+[(2-B)(1-\varepsilon)+\mu^2](w_1-c)+[\mu(1-B)+\varepsilon\mu](w_2-c)}{(-2+B)^2-\mu^2} \tag{S49}$$

Similarly, we obtain

$$t_2^{**}(w_2, e) = B_0 \cdot \frac{d+\lambda(2-B+\mu)e+[\mu(1-B)+\varepsilon\mu](w_1-c)+[(2-B)(1-\varepsilon)+\mu^2](w_2-c)}{(-2+B)^2-\mu^2} \tag{S50}$$

Substituting Equations (S45), (S46), and (S49) into the demand function (1), we can obtain

$$\begin{aligned}
Q_1 &= \frac{(-2+B)(1-\varepsilon)+\mu^2}{(-2+B)^2-\mu^2}(w_1-c) + \frac{\mu(B-1)(3\varepsilon-\varepsilon B-1)+\mu^3\varepsilon}{(-2+B)^2-\mu^2}(w_2-c) \\
&\quad + \frac{\lambda(2-B+\mu)}{(-2+B)^2-\mu^2}e + \frac{d}{(-2+B)^2-\mu^2}
\end{aligned} \tag{S51}$$

Substituting Equations (S45), (S46), and (S50) into the demand function (2), we can obtain

$$\begin{aligned}
Q_2 &= \frac{\mu(B-1)(3\varepsilon-\varepsilon B-1)+\mu^3\varepsilon}{(-2+B)^2-\mu^2}(w_1-c) + \frac{(-2+B)(1-\varepsilon)+\mu^2}{(-2+B)^2-\mu^2}(w_2-c) \\
&\quad + \frac{\lambda(2-B+\mu)}{(-2+B)^2-\mu^2}e + \frac{d}{(-2+B)^2-\mu^2}
\end{aligned} \tag{S52}$$

(b) Next, to obtain optimal decisions we solve the first-order conditions. For this, differentiating  $Q_1$  and  $Q_2$  with respect to  $w_1$  and  $w_2$  yields

$$\begin{aligned}
\frac{\partial Q_1}{\partial w_1} &= \frac{(-2+B)(1-\varepsilon)+\mu^2}{(-2+B)^2-\mu^2} \\
\frac{\partial Q_2}{\partial w_1} &= \frac{\mu(B-1)(3\varepsilon-\varepsilon B-1)+\mu^3\varepsilon}{(-2+B)^2-\mu^2}
\end{aligned} \tag{S53}$$

$$\begin{aligned}\frac{\partial Q_1}{\partial w_2} &= \frac{\partial Q_2}{\partial w_1} = \frac{\mu(B-1)(3\varepsilon - \varepsilon B - 1) + \mu^3 \varepsilon}{(-2+B)^2 - \mu^2} \\ \frac{\partial Q_2}{\partial w_2} &= \frac{\partial Q_1}{\partial w_1} = \frac{(-2+B)(1-\varepsilon) + \mu^2}{(-2+B)^2 - \mu^2}\end{aligned}\quad (S54)$$

and note that

$$\begin{aligned}\frac{\partial \pi_s}{\partial w_1} &= Q_1 + (w_1 - c) \frac{\partial Q_1}{\partial w_1} + (w_2 - c) \frac{\partial Q_2}{\partial w_1} \\ \frac{\partial \pi_s}{\partial w_2} &= (w_1 - c) \frac{\partial Q_1}{\partial w_2} + Q_2 + (w_2 - c) \frac{\partial Q_2}{\partial w_2} \\ \frac{\partial \pi_s}{\partial e} &= (w_1 - c) \frac{\partial Q_1}{\partial e} + (w_2 - c) \frac{\partial Q_2}{\partial e} - 2\alpha e\end{aligned}\quad (S55)$$

Substituting Equations (S53) and (S54) into (S55) yields

$$\begin{aligned}\frac{\partial \pi_s}{\partial w_1} &= \frac{1}{(-2+B)^2 - \mu^2} [2M(w_1 - c) + 2N(w_2 - c) + \lambda(2 - B + \mu)e + d] \\ \frac{\partial \pi_s}{\partial w_2} &= \frac{1}{(-2+B)^2 - \mu^2} [2N(w_1 - c) + 2M(w_2 - c) + \lambda(2 - B + \mu)e + d] \\ \frac{\partial \pi_s}{\partial e} &= \frac{\lambda(2 - B + \mu)}{(-2+B)^2 - \mu^2} (w_1 - c) + \frac{\lambda(2 - B + \mu)}{(-2+B)^2 - \mu^2} (w_2 - c) - 2\alpha e\end{aligned}\quad (S56)$$

where  $M$  and  $N$  are defined in Equation (53).

Setting the above first-order derivatives equal to 0, we can obtain

$$\begin{aligned}2M(w_1 - c) + 2N(w_2 - c) + \lambda(2 - B + \mu)e + d &= 0 \\ 2N(w_1 - c) + 2M(w_2 - c) + \lambda(2 - B + \mu)e + d &= 0 \\ \lambda(w_1 - c) + \lambda(w_2 - c) - 2\alpha(2 - B - \mu)e &= 0\end{aligned}\quad (S57)$$

The Hessian matrix is

$$\bar{H}_1 = \begin{bmatrix} 2M & 2N & \lambda(2 - B + \mu) \\ 2N & 2M & \lambda(2 - B + \mu) \\ \lambda & \lambda & -2\alpha(2 - B - \mu) \end{bmatrix}\quad (S58)$$

The first leading principal minor of  $H_1$  is

$$\bar{D}_1 = 2M = 2[(-2+B)(1-\varepsilon) + \mu^2] = 2[(-2+B) + \mu^2 + (2-B)\varepsilon]\quad (S59)$$

Since  $\varepsilon < \frac{2-B-\mu^2}{2-B}$ , we have  $\bar{D}_1 < 0$ .

The second leading principal minor of  $H_1$  is equal to

$$\bar{D}_2 = 4(M^2 - N^2) = 4(M - N)(M + N)\quad (S60)$$

According to Lemma 5,  $\bar{D}_2 > 0$ .

The third leading principal minor of  $H_1$  is as follows:

$$\bar{D}_3 = -4(M - N)[\lambda^2(2 - B + \mu) + 2\alpha(M + N)(2 - B - \mu)] \quad (S61)$$

Based on Condition (58) and Inequality (4), it is clear that

$$\lambda^2(2 - B + \mu) + 2\alpha(M + N)(2 - B - \mu) < 0 \quad (S62)$$

Based on Lemma 5 and Inequality (S62), we have  $\bar{D}_3 < 0$ .

Therefore, the matrix  $H_1$  is negative definite, indicating that  $\pi_s$  is a strictly concave function of  $w_1$ ,  $w_1$ , and  $e$ , and has a unique optimal solution.

Finally, solving the linear system of Equation (S56) yields the equilibrium pricing decisions  $w_1^{**}$  and  $w_2^{**}$  in Equation (59) and  $e^{**}$  in Equation (60).

From Assumption 2 and Inequalities (25) and (S62), we have  $w_1^{**}$ ,  $w_2^{**}$ , and  $e^{**}$  as positive and  $w_1^{**} = w_2^{**} > c$ .

(c) Finally, we can derive the freight service prices, brand extension efforts, market demands, and profits under the optimal decisions.

By substituting Equations (59) and (60) back into Equations (S45) and (S46), the optimal freight service prices can be determined. In fact, considering Equation (S45) and given that  $w_1^{**} = w_2^{**}$ , we can deduce that

$$\begin{aligned} p_1^{**} &= \frac{(k + \lambda e^{**}) + c(1 - B)}{2 - B - \mu} + \frac{[(1 - B)(1 - \varepsilon) + \varepsilon\mu](w_1^{**} - c)}{2 - B - \mu} \\ &= \frac{k + (1 - B)c}{(2 - B - \mu)} + \frac{-d\lambda^2 - d\alpha[(1 - B)(1 - \varepsilon) + \varepsilon\mu](2 - B - \mu)}{(2 - B - \mu)[\lambda^2(2 - B + \mu) + 2\alpha(M + N)(2 - B - \mu)]} \\ &= \frac{k + (1 - B)c}{(2 - B - \mu)} - c + \frac{-d\lambda^2 - d\alpha[(1 - B)(1 - \varepsilon) + \varepsilon\mu](2 - B - \mu)}{(2 - B - \mu)[\lambda^2(2 - B + \mu) + 2\alpha(M + N)(2 - B - \mu)]} + c \\ &= \frac{k - (1 - \mu)c}{(2 - B - \mu)} + \frac{-d\lambda^2 - d\alpha[(1 - B)(1 - \varepsilon) + \varepsilon\mu](2 - B - \mu)}{(2 - B - \mu)[\lambda^2(2 - B + \mu) + 2\alpha(M + N)(2 - B - \mu)]} + c \end{aligned} \quad (S63)$$

$$\text{Let } \bar{w}_1^{**} = c + \frac{-d\alpha(2 - B - \mu)(1 - \varepsilon)}{\lambda^2(2 - B + \mu) + 2\alpha(M + N)(2 - B - \mu)}. \text{ Thus, from Lemma 2,}$$

Equation (S63) can be rewritten as

$$\begin{aligned} p_1^{**} &= \frac{[k - (1 - \mu)c] \cdot 2\alpha(M + N)(2 - B - \mu) - d\alpha[(1 - B)(1 - \varepsilon) + \varepsilon\mu](2 - B - \mu)}{(2 - B - \mu)[\lambda^2(2 - B + \mu) + 2\alpha(M + N)(2 - B - \mu)]} - \bar{w}_1^{**} + \bar{w}_1^{**} + c \\ &= \frac{[k - (1 - \mu)c] \cdot 2\alpha(M + N) - d\alpha[(1 - B)(1 - \varepsilon) + \varepsilon\mu - (2 - B - \mu)(1 - \varepsilon)]}{\lambda^2(2 - B + \mu) + 2\alpha(M + N)(2 - B - \mu)} + \bar{w}_1^{**} \\ &= \frac{[k - (1 - \mu)c] \cdot 2\alpha(M + N) + d\alpha[(1 - \mu)(1 - \varepsilon) - \varepsilon\mu]}{\lambda^2(2 - B + \mu) + 2\alpha(M + N)(2 - B - \mu)} + \bar{w}_1^{**} \\ &= \frac{\alpha[k - (1 - \mu)c] \cdot \{2(M + N) + (2 - B + \mu)(1 - \mu) - (2 - B + \mu)[(1 - \mu)\varepsilon + \varepsilon\mu]\}}{\lambda^2(2 - B + \mu) + 2\alpha(M + N)(2 - B - \mu)} + \bar{w}_1^{**} \end{aligned} \quad (S64)$$

By noting that  $M + N = s_1\varepsilon + s_2$  and  $s_2 = -(2 - B + \mu)(1 - \mu)$  based on Lemma 5, Equation (S64) can be rewritten as

$$\begin{aligned}
 p_1^{**} &= \frac{\alpha[k - (1 - \mu)c] \cdot \{2s_1\varepsilon + s_2 - (2 - B + \mu)\varepsilon\}}{\lambda^2(2 - B + \mu) + 2\alpha(M + N)(2 - B - \mu)} + \bar{w}_1^{**} \\
 &= \frac{\alpha[k - (1 - \mu)c] \cdot \{2s_1\varepsilon + s_2 - (2 - B + \mu)\varepsilon\}}{\lambda^2(2 - B + \mu) + 2\alpha(M + N)(2 - B - \mu)} + \bar{w}_1^{**} \\
 &= \frac{\alpha[k - (1 - \mu)c] \cdot [2s_1\varepsilon + s_2 - (2 - B + \mu)\varepsilon] - d\alpha(2 - B - \mu)(1 - \varepsilon)}{\lambda^2(2 - B + \mu) + 2\alpha(M + N)(2 - B - \mu)} + c
 \end{aligned} \tag{S65}$$

Thus, Equation (61) holds.

In the subsequent analysis, we will prove that  $p_1^{**} > w_1^{**}$ . In fact, from Equations (S65) and (59), we can obtain

$$\begin{aligned}
 p_1^{**} &= \frac{\alpha[k - (1 - \mu)c] \cdot [2s_1\varepsilon + s_2 - (2 - B + \mu)\varepsilon]}{\lambda^2(2 - B + \mu) + 2\alpha(M + N)(2 - B - \mu)} + \frac{-d\alpha(2 - B - \mu)(-\varepsilon)}{\lambda^2(2 - B + \mu) + 2\alpha(M + N)(2 - B - \mu)} + w_1^{**} \\
 &= \frac{\alpha[k - (1 - \mu)c] \cdot [2s_1\varepsilon + s_2 - (2 - B + \mu)\varepsilon + (2 - B + \mu)(2 - B - \mu)\varepsilon]}{\lambda^2(2 - B + \mu) + 2\alpha(M + N)(2 - B - \mu)} + w_1^{**}
 \end{aligned} \tag{S66}$$

Because  $\varepsilon < \frac{-s_2}{s_5} = \frac{-s_2}{2s_1 - (2 - B + \mu) + (2 - B + \mu)(2 - B - \mu)}$ , it follows that  $2s_1\varepsilon + s_2 - (2 - B + \mu)\varepsilon + (2 - B + \mu)(2 - B - \mu)\varepsilon < 0$ . Therefore, based on Assumption 3 and Inequality (S62), we can immediately get  $p_1^{**} > w_1^{**} > 0$ .

Following a similar proof as above, we can obtain the expression for  $p_2^{**}$  and prove that  $p_2^{**} = p_1^{**} > w_2^{**}$ .

Replacing  $w_1$ ,  $w_2$ , and  $e$  with  $w_1^{**}$ ,  $w_2^{**}$ , and  $e^{**}$  in  $t_1^{**}(w_1, e)$  in Equation (S49) and  $t_2^{**}(w_1, e)$  in Equation (S50), respectively, we can obtain the equilibrium brand extension efforts in Equation (62). Indeed, as  $w_1^{**} = w_2^{**}$ ,  $s_2 = -2 + B + \mu^2 - \mu(B - 1) = C + D$  in Equation (54) and  $M + N = s_1\varepsilon + s_2$  from Lemma 5, it is apparent that

$$\begin{aligned}
 t_1^{**} &= B_0 \cdot \frac{d + \lambda(2 - B + \mu)e^{**} + [(-2 + B)(1 - \varepsilon) + \mu^2 + \mu(1 - B) + \varepsilon\mu](w_1^{**} - c)}{(-2 + B)^2 - \mu^2} \\
 &= B_0 \cdot \frac{d + \lambda(2 - B + \mu)e^{**} + (C + D)(w_1^{**} - c) + \varepsilon[2 - B + \mu](w_1^{**} - c)}{(-2 + B)^2 - \mu^2} \\
 &= \frac{B_0}{(-2 + B)^2 - \mu^2} \cdot \frac{d\alpha(2s_1\varepsilon + s_2)(2 - B - \mu) - \varepsilon d\alpha(2 - B - \mu)(2 - B + \mu)}{\lambda^2(2 - B + \mu) + 2\alpha(M + N)(2 - B - \mu)} \\
 &= \frac{B_0 \cdot d\alpha[2s_1\varepsilon + s_2 - \varepsilon(2 - B + \mu)]}{(2 - B + \mu)[\lambda^2(2 - B + \mu) + 2\alpha(M + N)(2 - B - \mu)]} \\
 &= \frac{\alpha B_0 \cdot [k - (1 - \mu)c] \cdot [2s_1\varepsilon + s_2 - \varepsilon(2 - B + \mu)]}{\lambda^2(2 - B + \mu) + 2\alpha(M + N)(2 - B - \mu)}
 \end{aligned} \tag{S67}$$

Based on Lemma 5, we have  $2s_1\varepsilon + s_2 - \varepsilon(2 - B + \mu) = M + N + s_1\varepsilon - \varepsilon(2 - B + \mu)$ , and since



$$\begin{aligned}
s_1 \varepsilon - \varepsilon(2 - B + \mu) &= (2 - B + \mu)[(1 - \mu)^2 + \mu B] \varepsilon - \varepsilon(2 - B + \mu) \\
&= (2 - B + \mu)[(1 - \mu)^2 + \mu B - 1] \varepsilon = (2 - B + \mu)[-2\mu + \mu^2 + \mu B] \\
&= -\mu \varepsilon(2 - B + \mu)[2 - B - \mu] < 0
\end{aligned} \tag{S68}$$

and  $M + N < 0$  from Lemma 5, it is clear that  $t_1^{**}$  is positive as a result of Assumption 3 and Inequality (S62).

Similar to the above derivation, we can obtain  $t_2^{**} = t_1^{**}$ .

Replacing  $w_1, w_2$  and  $e$  with  $w_1^{**}, w_2^{**}$ , and  $e^{**}$  in  $Q_1$  in Equation (S51) and  $Q_2$  in Equation (S52), respectively, we can derive the market demands under the optimal decision. Specifically, since  $w_1^{**} = w_2^{**}$ , it can be concluded that

$$\begin{aligned}
Q_1^{**} &= \frac{M + N}{(-2 + B)^2 - \mu^2} (w_1^{**} - c) + \frac{\lambda(2 - B + \mu)}{(-2 + B)^2 - \mu^2} e^{**} + \frac{d}{(-2 + B)^2 - \mu^2} \\
&= \frac{-d[\alpha(2 - B - \mu)(M + N) + \lambda^2(2 - B + \mu)]}{[(-2 + B)^2 - \mu^2][\lambda^2(2 - B + \mu) + 2\alpha(M + N)(2 - B - \mu)]} + \frac{d}{(-2 + B)^2 - \mu^2} \\
&= \frac{-d}{(-2 + B)^2 - \mu^2} \left[ \frac{\alpha(2 - B - \mu)(M + N) + \lambda^2(2 - B + \mu)}{\lambda^2(2 - B + \mu) + 2\alpha(M + N)(2 - B - \mu)} - 1 \right] \\
&= \frac{\alpha(M + N)(2 - B + \mu)[k - c(1 - \mu)]}{(2 - B + \mu)[\lambda^2(2 - B + \mu) + 2\alpha(M + N)(2 - B - \mu)]} \\
&= \frac{\alpha(M + N)[k - c(1 - \mu)]}{\lambda^2(2 - B + \mu) + 2\alpha(M + N)(2 - B - \mu)}
\end{aligned} \tag{S69}$$

Owing to Lemma 5, Assumption 3, and Inequality (S62), it is clear that  $Q_1^{**}$  is positive.

Similarly, we can obtain  $Q_2^{**} = Q_1^{**}$ .

We substitute  $w_1^{**}, w_2^{**}, Q_1^{**}, Q_2^{**}$ , and  $e^{**}$  into Equation (6) and then get the equilibrium profits  $\pi_s^{**}$  in Equation (64). In fact, by taking into account  $w_1^{**} = w_2^{**}$ , we can deduce that

$$\begin{aligned}
\pi_s^{**} &= (w_1^{**} - c)Q_1^{**} + (w_2^{**} - c)Q_2^{**} - \alpha e^{**2} = (Q_1^{**} + Q_2^{**})(w_1^{**} - c) - \alpha e^{**2} \\
&= \frac{\alpha d[k - c(1 - \mu)] \cdot [-2\alpha(M + N)(2 - B - \mu) - \lambda^2(2 - B + \mu)]}{[\lambda^2(2 - B + \mu) + 2\alpha(M + N)(2 - B - \mu)]^2} \\
&= \frac{-\alpha d[k - c(1 - \mu)]}{\lambda^2(2 - B + \mu) + 2\alpha(M + N)(2 - B - \mu)}
\end{aligned} \tag{S70}$$

Resulting from Lemma 2, Assumption 3, and Inequality (S62), it is evident that  $\pi_s^{**}$  is positive.

Subsequently, the maximal profits  $\pi_{f_1}^{**}$  and  $\pi_{f_2}^{**}$  can be obtained by substituting  $w_1^{**} = w_2^{**}$  in Equation (59),  $p_1^{**} = p_2^{**}$  in Equation (61),  $t_1^{**} = t_2^{**}$  in (62), and  $Q_2^{**} = Q_1^{**}$  in (63) into the  $\pi_{f_1}$  in (7) and  $\pi_{f_2}$  in (8), respectively. In fact, we have

$$\begin{aligned}
 \pi_{f_1}^{**} &= \pi_{f_2}^{**} = (p_1^{**} - w_1^{**}) Q_1^{**} - \beta t_1^{**2} \\
 &= \frac{\alpha^2 \cdot [k - (1 - \mu)c]^2 \cdot [2s_1\varepsilon + s_2 - (2 - B + \mu)\varepsilon + (2 - B + \mu)(2 - B - \mu)\varepsilon](M + N)}{[\lambda^2(2 - B + \mu) + 2\alpha(M + N)(2 - B - \mu)]^2} \\
 &\quad - \frac{\alpha^2 \beta \cdot B_0^2 \cdot [k - (1 - \mu)c]^2 \cdot [2s_1\varepsilon + s_2 - \varepsilon(2 - B + \mu)]^2}{[\lambda^2(2 - B + \mu) + 2\alpha(M + N)(2 - B - \mu)]^2} \\
 &= \frac{\alpha^2 \cdot [k - (1 - \mu)c]^2 \cdot L}{[\lambda^2(2 - B + \mu) + 2\alpha(M + N)(2 - B - \mu)]^2}
 \end{aligned} \tag{S71}$$

where

$$\begin{aligned}
 L &= [2s_1\varepsilon + s_2 - (2 - B + \mu)\varepsilon + (2 - B + \mu)(2 - B - \mu)\varepsilon](M + N) - \beta \cdot B_0^2 [2s_1\varepsilon + s_2 - \varepsilon(2 - B + \mu)] \\
 &= [M + N + s_1\varepsilon - (2 - B + \mu)\varepsilon + (2 - B + \mu)(2 - B - \mu)\varepsilon](M + N) \\
 &\quad - \beta \cdot B_0^2 [M + N]^2 - 2\beta \cdot B_0^2 [M + N][s_1\varepsilon - \varepsilon(2 - B + \mu)] - \beta \cdot B_0^2 [s_1\varepsilon - \varepsilon(2 - B + \mu)]^2 \\
 &= (1 - \beta \cdot B_0^2)(M + N)^2 + \varepsilon E(M + N) - \beta \cdot B_0^2 [s_1\varepsilon - \varepsilon(2 - B + \mu)]^2
 \end{aligned} \tag{S72}$$

in which

$$\begin{aligned}
 E &= s_1 - (2 - B + \mu) + (2 - B + \mu)(2 - B - \mu) - B[s_1 - (2 - B + \mu)] \\
 &= (1 - B)[s_1 - (2 - B + \mu)] + (2 - B + \mu)(2 - B - \mu) \\
 &= (1 - B)s_1 - (2 - B + \mu)[-1 + \mu] \\
 &= (1 - B)s_1 - s_2
 \end{aligned} \tag{S73}$$

Note that in the above derivation, we used the relation  $B = \eta B_0 = \eta \frac{\eta}{2\beta} = 2\beta \frac{\eta^2}{4\beta^2} = 2\beta B_0^2$  from Equation (3). Therefore, Proposition 2 is proved.

### S2.9. Proof of Corollary 1

**Proof.** In order to prove that  $\pi_{f_1} > 0$ , it suffices to show that  $L > 0$ . Since

$$\begin{aligned}
 \varepsilon &< \frac{-s_2(2 - B)}{(2 - B)s_1 + E + \sqrt{E^2 + (2 - B)B[s_1 - (2 - B + \mu)]^2}}, \text{ we have} \\
 (2 - B)(s_1\varepsilon + s_2) &< -\varepsilon E - \varepsilon \sqrt{E^2 + (2 - B)B[s_1 - (2 - B + \mu)]^2}
 \end{aligned} \tag{S74}$$

We note that  $s_1\varepsilon + s_2 = M + N$  from Lemma 5 and  $B = \eta B_0 = \eta \frac{\eta}{2\beta} = 2\beta \frac{\eta^2}{4\beta^2} = 2\beta B_0^2$  from Equation (3). Therefore,

$$\begin{aligned}
 M + N &< \frac{-\varepsilon E - \varepsilon \sqrt{E^2 + (2 - B)B[s_1 - (2 - B + \mu)]^2}}{2 - B} \\
 &= \frac{-\varepsilon E - \varepsilon \sqrt{E^2 + 4(1 - \beta \cdot B_0^2)\beta \cdot B_0^2[s_1 - (2 - B + \mu)]^2}}{2(1 - \beta \cdot B_0^2)}
 \end{aligned} \tag{S75}$$

Let

$$x_{1,2} = \frac{-\varepsilon E m \varepsilon \sqrt{E^2 + 4(1 - \beta \cdot B_0^2) \beta \cdot B_0^2 [s_1 - (2 - B + \mu)]^2}}{2(1 - \beta \cdot B_0^2)} \quad (S76)$$

and note that  $\beta \cdot B_0^2 = \beta \frac{\eta^2}{4\beta^2} = \frac{\eta^2}{4\beta} < 1$  from Assumption 1. Therefore,

$$(1 - \beta \cdot B_0^2)(M + N - x_1)(M + N - x_2) > 0 \quad (S77)$$

By substituting the values of  $x_1$  and  $x_2$  into the above inequality, it can be re-written as

$$(1 - \beta \cdot B_0^2)(M + N)^2 + \varepsilon E(M + N) - \beta \cdot B_0^2 [s_1 - (2 - B + \mu)]^2 > 0 \quad (S78)$$

As a results,  $L > 0$ , and the proof is established.

### S2.10. Proof of Proposition 3

First, the effects of the parameters  $\lambda$  and  $\varepsilon$  on  $w_i^{**}$  and  $e^{**}$  are explored. By taking the partial derivatives of  $w_i^{**}$  with respect to  $\lambda$  and  $\varepsilon$ , respectively, we obtain

$$\begin{aligned} \frac{\partial w_i^{**}}{\partial \lambda} &= \frac{2\lambda d \alpha (2 - B - \mu)(2 - B + \mu)}{[\lambda^2 (2 - B + \mu) + 2\alpha (M + N)(2 - B - \mu)]^2} > 0 \\ \frac{\partial w_i^{**}}{\partial \varepsilon} &= \frac{2\alpha^2 (2 - B - \mu)^2 ds_1}{[\lambda^2 (2 - B + \mu) + 2\alpha (M + N)(2 - B - \mu)]^2} > 0 \end{aligned} \quad (S79)$$

This indicates that  $w_i^{**}$  increases with  $\lambda$  and  $\varepsilon$ .

Similarly, by taking the partial derivative of  $e^{**}$  with respect to  $\lambda$  and  $\varepsilon$ , respectively, we obtain

$$\begin{aligned} \frac{\partial e^{**}}{\partial \lambda} &= \frac{2d \lambda^2 (2 - B + \mu)}{[\lambda^2 (2 - B + \mu) + 2\alpha (M + N)(2 - B - \mu)]^2} > 0 \\ \frac{\partial e^{**}}{\partial \varepsilon} &= \frac{2\alpha d \lambda (2 - B - \mu) s_1}{[\lambda^2 (2 - B + \mu) + 2\alpha (M + N)(2 - B - \mu)]^2} > 0 \end{aligned} \quad (S80)$$

This reveals that  $e^{**}$  increases with  $\lambda$  and  $\varepsilon$ .

Second, we analyze the effects of parameters  $\lambda$  and  $\varepsilon$  on  $p_i^{**}$ .

Given that  $d = [k - (1 - \mu)c] \cdot (2 - B + \mu)$ , Equation (56), and Condition (57), it follows that

$$\begin{aligned} &\alpha[k - (1 - \mu)c] \cdot [2s_1 \varepsilon + s_2 - (2 - B + \mu)\varepsilon] - d\alpha(2 - B - \mu)(1 - \varepsilon) \\ &= \alpha[k - (1 - \mu)c] \cdot [s_5 \varepsilon + s_2 - (2 - B + \mu)(2 - B - \mu)] \\ &< 0 \end{aligned} \quad (S81)$$

Thus, differentiating  $p_i^{**}$  with respect to  $\lambda$  yields

$$\frac{\partial p_i^{**}}{\partial \lambda} = \alpha[k - (1 - \mu)c] \cdot \frac{-[s_5 \varepsilon + s_2 - (2 - B + \mu)(2 - B - \mu)] \cdot 2\lambda(2 - B + \mu)}{[\lambda^2(2 - B + \mu) + 2\alpha(M + N)(2 - B - \mu)]^2} > 0 \quad (\text{S82})$$

This indicates that  $p_i^{**}$  increases with  $\lambda$ .

Differentiating  $p_i^{**}$  with respect to  $\varepsilon$  results in

$$\frac{\partial p_i^{**}}{\partial \varepsilon} = \alpha[k - (1 - \mu)c] \cdot \frac{s_5 \cdot F - [s_5 \varepsilon + s_2 - (2 - B + \mu)(2 - B - \mu)] 2\alpha s_1 (2 - B - \mu)}{[\lambda^2(2 - B + \mu) + 2\alpha(M + N)(2 - B - \mu)]^2} \quad (\text{S83})$$

From Assumption 3,  $k - (1 - \mu)c > 0$ . To prove that  $\frac{\partial p_i^{**}}{\partial \varepsilon} > 0$ , it is only necessary to demonstrate that  $s_5 \cdot F - [s_5 \varepsilon + s_2 - (2 - B + \mu)(2 - B - \mu)] 2\alpha s_1 (2 - B - \mu) > 0$ . It is clear that  $\mu - 1 < B + \mu - 1$ . By multiplying both sides of the above inequality by  $\mu(2 - B - \mu)$ , we get  $\mu[2 - B - \mu](\mu - 1) < \mu(2 - B - \mu) \cdot (B + \mu - 1)$ . That is,  $(1 - \mu)[-2\mu + \mu B + \mu^2] < (2 - B - \mu) \cdot [\mu B + \mu^2 - \mu]$ , which is equivalent to

$$(1 - \mu)[\mu B + (1 - \mu)^2 - 1] < (2 - B - \mu) \cdot [\mu B + (1 - \mu)^2 + \mu - 1] \quad (\text{S84})$$

By multiplying  $(2 - B + \mu)$  on both sides of Equation (S84), it follows from Formula (54) that

$$-s_2 \cdot [\mu B + (1 - \mu)^2 - 1] < (2 - B - \mu) \cdot [s_1 + s_2] \quad (\text{S85})$$

Multiplying both sides of Equation (S85) by  $(2 - B + \mu)$  leads to

$$-s_2 \cdot s_1 + (2 - B + \mu)s_2 < (2 - B + \mu)(2 - B - \mu) \cdot [s_1 + s_2] \quad (\text{S86})$$

This is equivalent to

$$-s_2 \cdot s_1 - (2 - B + \mu)(2 - B - \mu) \cdot s_1 < -(2 - B + \mu)s_2 + (2 - B + \mu)(2 - B - \mu)s_2 \quad (\text{S87})$$

Adding  $2s_1s_2$  to both sides of Equation (S87) gives

$$[s_2 - (2 - B + \mu)(2 - B - \mu)] \cdot s_1 < [2s_1 - (2 - B + \mu) + (2 - B + \mu)(2 - B - \mu)]s_2 \quad (\text{S88})$$

By adding  $s_5s_1\varepsilon$  to both sides of Equation (S88) and utilizing Equation (56), we obtain

$$[s_5\varepsilon + s_2 - (2 - B + \mu)(2 - B - \mu)] \cdot s_1 < s_5(s_1\varepsilon + s_2) \quad (\text{S89})$$

Multiplying both sides of Equation (S89) with  $2\alpha(2 - B - \mu)$  and employing Lemma 5 yields

$$[s_5\varepsilon + s_2 - (2 - B + \mu)(2 - B - \mu)] \cdot 2\alpha s_1 (2 - B - \mu) < s_5 2\alpha(M + N)(2 - B - \mu) \quad (\text{S90})$$

Additionally, it is clear that

$$[s_5\varepsilon + s_2 - (2 - B + \mu)(2 - B - \mu)] \cdot 2\alpha s_1 (2 - B - \mu) < s_5 \cdot \lambda^2(2 - B + \mu) + s_5 \cdot 2\alpha(M + N)(2 - B - \mu) \quad (\text{S91})$$

This is equivalent to  $s_5 \cdot F - [s_5\varepsilon + s_2 - (2 - B + \mu)(2 - B - \mu)] \cdot 2\alpha s_1 (2 - B - \mu) > 0$ .

Therefore,  $\frac{\partial p_i^{**}}{\partial \varepsilon} > 0$ , which implies that  $p_i^{**}$  increases with  $\varepsilon$ .

Next, we proceed to examine the effect of parameters  $\lambda$  and  $\varepsilon$  on  $t_i^{**}$ . The first-order derivative of  $t_i^{**}$  in Equation (62) with respect to  $\lambda$  is given by:

$$\begin{aligned}\frac{\partial t_i^{**}}{\partial \lambda} &= \frac{-2\lambda\alpha B_0 \cdot [k - (1 - \mu)c] \cdot [2s_1\varepsilon + s_2 - \varepsilon(2 - B + \mu)](2 - B + \mu)}{[\lambda^2(2 - B + \mu) + 2\alpha(M + N)(2 - B - \mu)]^2} \\ &= t_i^{**} \cdot \frac{-2\lambda(2 - B + \mu)}{F} > 0\end{aligned}\quad (S92)$$

This reveals that  $t_i^{**}$  increase with  $\lambda$ .

The first-order derivative of  $t_i^{**}$  in Equation (62) with respect to  $\varepsilon$  is expressed as:

$$\frac{\partial t_i^{**}}{\partial \varepsilon} = \alpha B_0 [k - (1 - \mu)c] \cdot \frac{H \cdot F - [H\varepsilon + s_2] \cdot [2\alpha s_1(2 - B - \mu)]}{[\lambda^2(2 - B + \mu) + 2\alpha(M + N)(2 - B - \mu)]} \quad (S93)$$

where  $H = 2s_1 - (2 - B + \mu)$ .

We can prove that  $s_1 < (2 - B + \mu)$ . In fact, from Assumption 2,  $2 - B - \mu > 0$ . Therefore, it can be seen from Formula (54) that  $s_1 = (2 - B + \mu)[(1 - \mu)^2 + \mu B] = (2 - B + \mu)[1 - 2\mu + \mu^2 + \mu B] = (2 - B + \mu)[1 - \mu(2 - B - \mu)] < (2 - B + \mu)$ . Thus,  $-s_2 \cdot s_1 < -(2 - B + \mu)s_2$ . Adding  $2s_1s_2$  to both sides of the above inequality, we have  $s_2 \cdot s_1 < [2s_1 - (2 - B + \mu)]s_2$ , that is,  $s_2 \cdot s_1 < Hs_2$ . Adding  $Hs_1\varepsilon$  to both sides of the above inequality, we get  $(H\varepsilon + s_2) \cdot s_1 < H(s_1\varepsilon + s_2) = H(M + N)$ , and hence,

$$(H\varepsilon + s_2) \cdot 2\alpha s_1(2 - B - \mu) < H2\alpha(M + N)(2 - B - \mu) \quad (S94)$$

Clearly,

$H \cdot \lambda^2(2 - B + \mu) + H2\alpha(M + N)(2 - B - \mu) > (H\varepsilon + s_2) \cdot 2\alpha s_1(2 - B - \mu)$ . This is,  $H \cdot F - [H\varepsilon + s_2] \cdot [2\alpha s_1(2 - B - \mu)] > 0$ . Thus,  $\frac{\partial t_i^{**}}{\partial \varepsilon} > 0$ , which implies that  $t_i^{**}$  increase with  $\varepsilon$ .

Lastly, we analyze the effects of the parameters  $\lambda$  and  $\varepsilon$  on  $Q_1^{**}$  and  $Q_2^{**}$ . Differentiating  $Q_1^{**}$  and  $Q_2^{**}$  in Equation (63) with respect to  $\lambda$  yields

$$\frac{\partial Q_1^{**}}{\partial \lambda} = \frac{\partial Q_2^{**}}{\partial \lambda} = \frac{-\alpha(M + N)[k - c(1 - \mu)] \cdot 2\lambda(2 - B + \mu)}{[\lambda^2(2 - B + \mu) + 2\alpha(M + N)(2 - B - \mu)]^2} > 0 \quad (S95)$$

Thus,  $Q_1^{**}$  and  $Q_2^{**}$  increase with  $\lambda$ .

Differentiating  $Q_1^{**}$  and  $Q_2^{**}$  in Equation (63) with respect to  $\varepsilon$  yields

$$\frac{\partial Q_1^{**}}{\partial \varepsilon} = \frac{\partial Q_2^{**}}{\partial \varepsilon} = \frac{\alpha \cdot s_1[k - c(1 - \mu)] \cdot \lambda^2(2 - B + \mu)}{[\lambda^2(2 - B + \mu) + 2\alpha(M + N)(2 - B - \mu)]^2} \quad (S96)$$

It follows from Assumption 3 that  $\frac{\partial Q_1^{**}}{\partial \varepsilon} = \frac{\partial Q_2^{**}}{\partial \varepsilon} > 0$ , which implies that  $Q_1^{**}$  and  $Q_2^{**}$  increase with  $\varepsilon$ .

By replacing  $\varepsilon$  with 0,  $w_i^{**}$  becomes  $w_i^*$ . Because  $w_i^{**}$  increase with  $\varepsilon$ , we have  $w_i^{**} > w_i^*$ . Similarly, it can be seen that  $e^{**} > e^*$ ,  $p_i^{**} > p_i^*$ ,  $t_i^{**} > t_i^*$ ,  $Q_1^{**} > Q_1^*$ , and  $Q_2^{**} > Q_2^*$ .  $\square$

#### S2.11. Proof of Proposition 4

**Proof.** First, consider the effect of  $\lambda$  on  $\pi_s^{**}$ . Differentiating  $\pi_s^{**}$  with respect to  $\lambda$  yields

$$\frac{\partial \pi_s^{**}}{\partial \lambda} = \frac{2\alpha d[k - c(1 - \mu)](2 - B + \mu)\lambda}{[\lambda^2(2 - B + \mu) + 2\alpha(M + N)(2 - B - \mu)]^2} \quad (S97)$$

Because of Lemma 2, Inequality (4), and Assumption 3, we have  $\frac{\partial \pi_s^{**}}{\partial \lambda} > 0$ .

Next, consider the effect of  $\varepsilon$  on  $\pi_s^{**}$ . Differentiating  $\pi_s^{**}$  with respect to  $\varepsilon$  results in

$$\frac{\partial \pi_s^{**}}{\partial \varepsilon} = \frac{2\alpha^2 d[k - c(1 - \mu)](2 - B - \mu)s_1}{[\lambda^2(2 - B + \mu) + 2\alpha(M + N)(2 - B - \mu)]^2} \quad (S98)$$

Based on Assumptions 2 and 3 and Inequalities (25) and (54), we have  $\frac{\partial \pi_s^{**}}{\partial \varepsilon} > 0$ . By setting  $\varepsilon$  as 0,  $\pi_s^{**}$  becomes  $\pi_s^*$ . Because  $\pi_s^{**}$  increase with  $\varepsilon$ , we have  $\pi_s^{**} > \pi_s^*$ .  $\square$

#### S2.12. Proof of Proposition 5

Differentiating  $\pi_{f_1}^{**} (= \pi_{f_2}^{**})$  with respect to  $\lambda$  gives

$$\begin{aligned} \frac{\partial \pi_{f_1}^{**}}{\partial \lambda} &= \frac{\partial \pi_{f_2}^{**}}{\partial \lambda} = \frac{4\alpha^2 \cdot [k - (1 - \mu)c]^2 \cdot L \cdot \lambda(2 - B + \mu)}{[\lambda^2(2 - B + \mu) + 2\alpha(M + N)(2 - B - \mu)]^3} \\ &= \frac{4\lambda(2 - B + \mu) \cdot \pi_{f_1}^{**}}{\lambda^2(2 - B + \mu) + 2\alpha(M + N)(2 - B - \mu)} > 0 \end{aligned} \quad (S99)$$

From Equation (S99), we can conclude that  $\pi_{f_1}^{**}$  and  $\pi_{f_2}^{**}$  increase with  $\lambda$ .

Next, consider the effects of  $\varepsilon$  on  $\pi_{f_1}^{**}$  and  $\pi_{f_2}^{**}$ . For this, differentiating  $L$  with respect to  $\varepsilon$  and taking into account that  $M + N = s_1\varepsilon + s_2$  from Lemma 5, we obtain:

$$\begin{aligned} \frac{\partial L}{\partial \varepsilon} &= (2 - B)(M + N)s_1 + E(M + N) + \varepsilon Es_1 - \varepsilon B[s_1 - (2 - B + \mu)]^2 \\ &= \{(2 - B)s_1^2 + 2Es_1 - B[s_1 - (2 - B + \mu)]^2\}\varepsilon + (3 - 2B)s_1s_2 - s_2s_2 \\ &= [(4 - 4B)s_1^2 - 2s_1s_2 + 2s_1B(2 - B + \mu) - B(2 - B + \mu)^2]\varepsilon + (3 - 2B)s_1s_2 - s_2^2 \end{aligned} \quad (S100)$$

Thus, it is easy to see that  $\frac{\partial L}{\partial \varepsilon} = 2l_1\varepsilon + l_2 = L_d$ . Then, we can find that

$$\begin{aligned}\frac{\partial \pi_{f_1}^{**}}{\partial \varepsilon} &= \frac{\partial \pi_{f_2}^{**}}{\partial \varepsilon} = \alpha^2 \cdot [k - (1 - \mu)c]^2 \cdot \frac{L_d \cdot F^2 - L \cdot 2 \cdot F \cdot [2\alpha s_1(2 - B - \mu)]}{[\lambda^2(2 - B + \mu) + 2\alpha(M + N)(2 - B - \mu)]^4} \\ &= \alpha^2 \cdot [k - (1 - \mu)c]^2 \cdot \frac{F[L_d \cdot F - 4L \cdot \alpha s_1(2 - B - \mu)]}{[\lambda^2(2 - B + \mu) + 2\alpha(M + N)(2 - B - \mu)]^4}\end{aligned}\quad (S101)$$

By noting that  $F < 0$  from Formulas (S62) and (68), and  $L > 0$  from Formulas (66) and (S78), it is concluded that  $\pi_{f_1}^{**}$  and  $\pi_{f_2}^{**}$  increase with  $\varepsilon$  if either the conditions (a) or (b) hold. In this case, it can be seen that  $\pi_{f_1}^{**} > \pi_{f_1}^*$  and  $\pi_{f_2}^{**} > \pi_{f_2}^*$  by setting  $\varepsilon = 0$  in  $\pi_{f_1}^{**}$  and  $\pi_{f_2}^{**}$ .

Equation (S101) also implies that  $\pi_{f_1}^{**}$  and  $\pi_{f_2}^{**}$  decrease with  $\varepsilon$ , given that the conditions (c) and (d) are satisfied. In this scenario, it is apparent that  $\pi_{f_1}^{**} < \pi_{f_1}^*$  and  $\pi_{f_2}^{**} < \pi_{f_2}^*$  by setting  $\varepsilon = 0$  in  $\pi_{f_1}^{**}$  and  $\pi_{f_2}^{**}$ .

Therefore, we can conclude that the outcomes described in (2) and (3) are valid.  $\square$

### S3. Mathematical Derivation in Remark 1

$M + N > 0$  and  $M - N > 0$  will lead to a contradiction:

In fact, if  $M + N > 0$  and  $M - N > 0$ , then  $\varepsilon$  needs to satisfy these two conditions, i.e.,  $\varepsilon > \frac{2 - B - \mu^2 + \mu(B - 1)}{2 - B + \mu(B - 1)(3 - B) + \mu^3}$  and  $\varepsilon > \frac{(2 - B) - \mu^2 - \mu(B - 1)}{(2 - B) - \mu(B - 1)(3 - B) - \mu^3}$ .

In order to ensure that the first leading principal minor is positive, we have proven that  $\varepsilon < \frac{2 - B - \mu^2}{2 - B}$ . Thus, the following two conditions must hold simultaneously: (1)

$$\begin{aligned}\frac{2 - B - \mu^2 + \mu(B - 1)}{2 - B + \mu(B - 1)(3 - B) + \mu^3} &< \frac{2 - B - \mu^2}{2 - B} \quad \text{and} \quad (2) \quad \frac{(2 - B) - \mu^2 - \mu(B - 1)}{(2 - B) - \mu(B - 1)(3 - B) - \mu^3} \\ &< \frac{2 - B - \mu^2}{2 - B}. \quad \text{Based on condition (1), it follows that } (2 - B)[2 - B - \mu^2 + \mu(B - 1)] \\ &< (2 - B - \mu^2)[2 - B + \mu(B - 1)(3 - B) + \mu^3].\end{aligned}$$

Consequently, we have

$$\mu(2 - B)(B - 1) < (2 - B)[\mu(B - 1)(3 - B) + \mu^3] - \mu^2[\mu(B - 1)(3 - B) + \mu^3] \quad (S102)$$

On the other hand, built on condition (2), it follows that  $(2 - B)[(2 - B) - \mu^2 - \mu(B - 1)] < [2 - B - \mu^2][(2 - B) - \mu(B - 1)(3 - B) - \mu^3]$ . Therefore, we obtain

$$(2 - B)[- \mu(B - 1)] < [2 - B][- \mu(B - 1)(3 - B) - \mu^3] - \mu^2[- \mu(B - 1)(3 - B) - \mu^3] \quad (S103)$$

However, this contradicts Equation (S102).  $\square$

### S4. Range of the Altruistic Preference Degree

The proof that the condition  $\varepsilon < \varepsilon_1$  in Corollary 1 is tighter than  $\varepsilon < \varepsilon_0$  in Proposition 2:

Indeed, it is clear that  $E + \sqrt{E^2 + (2-B)B[s_1 - (2-B+\mu)]^2} > 0$ . Thus, according to Equation (66), we have  $\varepsilon_2 < \frac{-s_2(2-B)}{(2-B)s_1} = \frac{-s_2}{s_1}$ . In addition, we can prove that

$$\varepsilon_2 < \frac{-s_2}{s_5} = \frac{-s_2}{2s_1 - (2-B+\mu) + (2-B+\mu)(2-B-\mu)} \quad (\text{S104})$$

In fact, because  $0 < B < 2$  from Assumption 2, we have  $(1-B)^2 = 1 - 2B + B^2 = 1 - B(2-B) < 1$ . Thus,  $(1-B)^2(2-B+\mu)^2(2-B-\mu)^2 < (2-B+\mu)^2(2-B-\mu)^2$ . Hence,

$$[s_1 - \delta_1 + (1-B)\delta_1\delta_2]^2 < [s_1 - \delta_1]^2 + 2(1-B)[s_1 - \delta_1]\delta_1\delta_2 + \delta_1^2\delta_2^2 \quad (\text{S105})$$

where  $\delta_1 = 2-B+\mu$  and  $\delta_2 = 2-B-\mu$ .

Considering that

$$\begin{aligned} E^2 + (2-B)B[s_1 - (2-B+\mu)]^2 \\ = \{(1-B)[s_1 - \delta_1] + \delta_1\delta_2\}^2 + (2-B)B[s_1 - \delta_1]^2 \\ = [s_1 - \delta_1]^2 + 2(1-B)[s_1 - \delta_1]\delta_1\delta_2 + (\delta_1\delta_2)^2 \end{aligned} \quad (\text{S106})$$

According to Equation (66), it follows from Equations (S105) and (S106) that

$$s_1 - \delta_1 + (1-B)\delta_1\delta_2 \leq |s_1 - \delta_1 + (1-B)\delta_1\delta_2| < \sqrt{E^2 + (2-B)B[s_1 - (2-B+\mu)]^2} \quad (\text{S107})$$

In view of  $s_1 - \delta_1 + (1-B)\delta_1\delta_2 = (2-B)[s_1 - \delta_1 + \delta_1\delta_2] - [(1-B)(s_1 - \delta_1) + \delta_1\delta_2]$ , and  $(1-B)(s_1 - \delta_1) + \delta_1\delta_2 = E$  by using Equation (66), it follows from Equation (S107) that

$$(2-B)[s_1 - \delta_1 + \delta_1\delta_2] < E + \sqrt{E^2 + (2-B)B[s_1 - (2-B+\mu)]^2} \quad (\text{S108})$$

Adding  $(2-B)s_1$  to both sides of Equation (S108), we have

$$(2-B)[2s_1 - \delta_1 + \delta_1\delta_2] < (2-B)s_1 + E + \sqrt{E^2 + (2-B)B[s_1 - (2-B+\mu)]^2} \quad (\text{S109})$$

It follows from Equation (S109) that

$$\frac{(2-B)}{(2-B)s_1 + E + \sqrt{E^2 + (2-B)B[s_1 - (2-B+\mu)]^2}} < \frac{1}{2s_1 - \delta_1 + \delta_1\delta_2} \quad (\text{S110})$$

Multiplying  $-s_2$  on both sides of Equation (S110), Equation (S104) follows.  $\square$

## S5. Data Collection and Calculation Basis (Including Key Parts in English)

### S5.1. Data Collection and Parameter Estimation

#### S5.1.1. Container Shipping Quotation

The container shipping quotations come from the following two companies in Tianjin, China.

Name of Freight Forwarder 1: Tianjin Yuzhou International Freight Forwarding Co., Ltd, Tianjin, China.

Web Site: <https://inter.chinawutong.com/fcl/204399.html> (accessed on 12 July 2023)

Webpage Snapshot: see next page (Figure S2).



Name of Freight Forwarder 2: Tianjin McKinley International Freight Forwarding Co., Ltd, Tianjin, China.

Web Site: [http://www.tjxg.cn/html/sea\\_detail\\_5068.html](http://www.tjxg.cn/html/sea_detail_5068.html) (accessed on 12 July 2023)

Webpage Snapshot: see next page (Figure S3).

Based on the above websites, we can obtain the following quotation table.

**Table S1.** Container shipping quotation from Tianjin Port in China to Haiphong in Vietnam.

|                     | 20 GP   | 40 GP   | 40 HQ/ 40 HC |
|---------------------|---------|---------|--------------|
| Freight Forwarder 1 | USD 250 | USD 350 | USD 350      |
| Freight Forwarder 2 | USD 250 | USD 400 | USD 400      |

欢迎来到物通国际频道! [请登录](#) [免费注册](#) [忘记密码?](#)

GPS定位 物通配货软件 物通服务 APP下载 帮助 物流查询

**物通国际物流**  
inter.chinawutong.com  
打造国内专业的国际物流平台

海运 | 空运 | 陆运

整箱运价 请输入起运地 → 请输入目的地 [搜索](#) [发布货盘](#) 客户服务热线 400-010-5656

首页 整箱运价 拼箱运价 散杂运价 空运运价 公路运价 铁路运价 货盘信息 物流服务 物流资讯

当前位置: 首页 > 海运运费查询 > 天津新港海运运费查询 > 天津新港到海防海运 > 天津新港到海防海运价格

### 中国 天津新港 → 越南 海防

时间: 2023-06-09 浏览量: 11 [扫一扫](#) [分享](#)

| 海运价 | \$250 | \$350 | \$350 | -   |
|-----|-------|-------|-------|-----|
| 箱型  | 20'   | 40'   | 40HQ  | 45' |

承运人: SITC-海丰国际 航程: 18天  
箱型: GP普箱 中转港: 上海  
离港班期: 四/日  
提单要求: MB/L(船公司提单)  
付款方式: PP(预付)  
联系人: 请[在线留言](#), 我们会与您及时联系  
港口查询: 越南港口查询

[联系我时, 请说明是在物通网上看到的, 谢谢!](#)

[在线留言](#) [进入企业网站](#)

**天津誉洲国际货运代理有限公司**

身份验证 [国](#) [信](#) [信](#)

工商注册信息: 认证中

联系人: 李先生

公司所在地: 天津市-天津市-塘沽区

详细地址: 天津市滨海新区贻航国际-10号楼

**公司主营运价** 更多+

- 中国 天津新港 → 中国 香港
- 中国 天津新港 → 菲律宾 达沃
- 中国 天津新港 → 菲律宾 卡加延德奥罗
- 中国 天津新港 → 菲律宾 宿务
- 中国 天津新港 → 菲律宾 苏比克
- 中国 天津新港 → 菲律宾 八打雁
- 中国 天津新港 → 叙利亚 拉塔基亚
- 中国 天津新港 → 罗马尼亚 康斯坦察
- 中国 天津新港 → 黎巴嫩 贝鲁特
- 中国 天津新港 → 土耳其 伊斯坦布尔

**公司形象展示** 更多+

[详细介绍](#) [公司信息](#) [联系方式](#)

天津新港到海防海运价格

发布公司: 天津誉洲国际货运代理有限公司

**Figure S2.** Webpage Snapshot of Freight Forwarder 1. Key Parts in English for Figure S2: Figure S2 is Vietnam sea freight container quotation and shipping schedule of Freight Forwarder 1 from Tianjin Port to Haiphong, Vietnam. Full container load sea freight quotation (USD) are 250 per 20 GP, 350 per 40 GP and 350 per 40 HQ, respectively. Quotation date: 6 June 2023. The length of the voyage is about 18 days.



整箱运价

天津新港(TIANJIN XINGANG) 到

[首页](#)
[关于我们](#)
[国际海运](#)
[国际海运报价](#)
[国际空运](#)
[公路运输](#)
[仓储服务](#)
[联系我们](#)

[国际海运](#)
[集装箱整柜报价](#)
[国际海运拼箱报价](#)
[船期表](#)
[货物追踪](#)
[集装箱尺](#)
[表单下载](#)
[国际空运](#)
[天津/首都机场空运报价](#)
[天津机场航班时刻表\(货运\)](#)
[附加费](#)
[仓储装箱](#)
[公路运输](#)
[集装箱拖车报价](#)
[联系方式](#)
[更多](#)

联系人: **郭小姐**  
海运部经理

QQ客服: **28333 69526**

手机: **130 7209 8708**

首页 > 国际海运 > 集装箱海运 > Haiphong, Vietnam, 海防,越南



### 天津港到Haiphong, Vietnam, 海防,越南海运费集装箱报价船期表

天津麦金利国际货运代理有限公司是一家具有拖车,集装箱堆场装箱, 海运, 报关的相关资质的企业, 提供 天津港到Haiphong, Vietnam, 海防,越南 20gp/40gp/40hq(小柜, 大柜, 高柜)集装箱整箱拼箱海运运费咨询,订舱,运输的货代业务,为您评估及制定最优质的最优惠的物流方案,从而使贵我两司达到双赢, 您的满意我们的动力。

| 整箱海运费 (USD)    | 20' | 40' | 40'HC |
|----------------|-----|-----|-------|
| 海运费报价 (All in) | 250 | 400 | 400   |

船公司: 联系我们吧

海运船期: 周二 Tuesday

航程: 15天左右

适用产品: 普通货

有效期: 2023-7-27

报价日期: 2023-7-12

[马上联系](#)
[直接订舱](#)

**Figure S3.** Webpage Snapshot of Freight Forwarder 2. Key Parts in English for Figure S3: Figure S3 is Vietnam sea freight container quotation and shipping schedule of Freight Forwarder 2 from Tianjin Port to Haiphong, Vietnam. Full container load sea freight quotation (USD) are 250 per 20 GP, 400 per 40 GP and 400 per 40 HC, respectively. Quotation date: 12 July 2023; Expiration date: 27 July 2023. The length of the voyage is about 15 days.

#### S5.1.2. Estimation of the Shipping Company's Marginal Cost

Because the cost often belongs to the trade secrets of an enterprise, we have to estimate it.

From the water transport logistics website, the profit margin of freight forwarders is about 20 to 30 percent (<http://www.shuishangwuliu.com/jiabanjixie/148461.html>, accessed on 12 July 2023), and the profit margin in the shipping industry is around 15 to 25 percent (<http://www.shuishangwuliu.com/chanpinfenlei/29056.html>, accessed on 12 July 2023).

Thus, by using Table A1, based on the container shipping quotation (USD 250 per standard container (20 GP)) from one port of departure to one port of destination, we estimate that the wholesale price is about USD 150 per standard container according to the profit rate of freight forwarders, and then estimate that the cost of the shipping company is about USD 150 per standard container. That,  $c \approx \text{USD}150$  per standard container.

#### S5.1.3. Estimation of the Basic Market Demand

According to the official website of Tianjin Port Group, in the first half of 2023, the cargo throughput of Tianjin Port Group was 241 million tons; the container throughput was 11.353 million standard containers (<https://www.ptacn.com/contents/17/1715.html>, accessed on 12 June 2023).

Tianjin Port has 140 container routes (<https://www.ptacn.com/channels/12.html>, accessed on 12 June 2023).

According to the website of fobshanghai, Tianjin has 1200 sea freight forwarders, including branches established by companies from other regions (Accessed from <https://link.fobshanghai.com/info/tianjinhaiyunhuodai.html>, accessed on 12 June 2023).

Therefore, through a simple calculation, a freight forwarding company faces an annual basic demand of about 135 standard containers.

Specifically,  $k \approx [(1135.3 \div 0.12) \div 140] \times 2 \approx 135$ .

*S5.2. Determinations of  $\varepsilon \in (0, 0.328)$  and  $\lambda \in J = (0, 1.61)$*

In Supplementary Material Section 4, we have proved that the condition  $\varepsilon < \varepsilon_1$  in Corollary 1 is tighter than  $\varepsilon < \varepsilon_0$  in Proposition 2. Thus, the range of  $\varepsilon$  is determined by  $\varepsilon_1$  in Remark 2.

By using Formula (28), we have  $\lambda \in (0, 2.3664)$  by direct calculation, and by using Formula (58), we have  $\lambda \in J = (0, 1.61)$  by calculation. Thus,  $\lambda \in J = (0, 1.61)$ . In fact, from Formula (58), we have

$$\lambda^2 < \frac{-2\alpha(M+N)(2-B-\mu)}{2-B+\mu}$$

Denote  $y = \frac{-2\alpha(M+N)(2-B-\mu)}{2-B+\mu}$ . Note that  $M+N = s_1\varepsilon + s_2$  by Lemma 5.

Therefore,  $\frac{\partial y}{\partial \varepsilon} = \frac{-2\alpha s_1(2-B-\mu)}{2-B+\mu}$ . Because  $s_1 > 0$  by Lemma 5, we have  $\frac{\partial y}{\partial \varepsilon} < 0$ .

Thus,  $\lambda_{\min} = \sqrt{\frac{-2\alpha(M+N)(2-B-\mu)}{2-B+\mu}} \Big|_{\varepsilon=0.328} = 1.61$ .
